# Supplementary material
Source: PubMed Central journal article supplement (PMC10540103)
Supplement: tpmd220798.SD1.pdf [file tpmd220798.SD1.pdf]

| Participant | Age (years) | Sex | HIV Status | Main symptom Reported     | Duration of Symptoms (days) | Hospitalized? | Time out of school                                                 |
|-------------|-------------|-----|------------|---------------------------|-----------------------------|---------------|--------------------------------------------------------------------|
| 1           | 14          | F   | Positive   | Lymph node swelling       | 30                          | No            | None                                                               |
| 2           | 10          | F   | Negative   | Lymph node swelling       | 28                          | No            | 1-3 weeks                                                          |
| 3           | 4           | M   | Negative   | Lymph node swelling       | 28                          | No            | 1-3 weeks                                                          |
| 4           | 13          | F   | Unknown    | Lymph node swelling       | 210                         | No            | At least 67 days, was not back to school at the time of interview* |
| 5           | 14          | M   | Negative   | Lymph node swelling       | 30                          | No            | 30 days                                                            |
| 6           | 7           | M   | Unknown    | Cough                     | 60                          | Yes           | 60 days                                                            |
| 7           | 11          | M   | Negative   | Lymph nodes swelling      | 366                         | No            | 1-3 weeks                                                          |
| 8           | 14          | M   | Negative   | Cough                     | 30                          | No            | No longer in school, unclear if TB related                         |
| 9           | 16          | F   | Negative   | Back pain and weight loss | 408                         | No            | 408 days                                                           |

**Supplemental Table:** Baseline characteristics of participants in qualitative interviews:

|           |    |   |          |                                   |     |     |                                                                     |
|-----------|----|---|----------|-----------------------------------|-----|-----|---------------------------------------------------------------------|
| <b>10</b> | 16 | F | Negative | Cough and difficulty in breathing | 365 | Yes | 365 days                                                            |
| <b>11</b> | 13 | F | Negative | Lymph node swelling               | 56  | No  | 56 days                                                             |
| <b>12</b> | 12 | M | Negative | Lymph node swelling and cough     | 72  | No  | 72 days                                                             |
| <b>13</b> | 5  | M | Negative | Lymph node swelling and cough     | 60  | No  | 1-3 weeks                                                           |
| <b>14</b> | 13 | M | Negative | Lymph node swelling               | 300 | No  | At least 55 days, was not back to school at the time of interview** |
| <b>15</b> | 12 | F | Negative | Cough and difficulty breathing    | 395 | No  | 395 days                                                            |
| <b>16</b> | 14 | F | Negative | Cough                             | 28  | No  | Missed schools on days of clinic follow ups                         |

F: Female, M: Male, HIV: human immunodeficiency virus, TB: Tuberculosis.

\* During the interview, reported not going to school since onset of illness. Interview occurred 67 days after TB treatment was initiated. Also reported headaches, weight loss, diarrhea, shortness of breath and chest pain upon review of symptoms.

\*\* During the interview, reported not going to school since onset of illness. Interview occurred 55 days after TB treatment was initiated. Also reported fevers, sweats, and loss of weight upon review of symptoms.

## **Interview Guide**

Thank you again for participating in this interview. As we mentioned in the consent form, our research team is interested in learning more about your family's background, your experience having a child diagnosed with tuberculosis (TB), your thoughts and feelings about TB medications and how your child's illness has impacted your household. We are also interested to learn what additional information, resources or support may have been helpful to you and your family when your child was first diagnosed and over the course of his/her illness. We will be taping the interview with an audio recorder. Please do not refer to yourself or to your child by name in order to keep the recording confidential.

### **Background**

- What village are you and your family from? What tribe do you belong to?
- Who lives in your household? Who are the child's guardians?
- What language(s) do you mostly speak at home? (If not Swahili ask: Do you also speak Swahili?)
- How old is your child? What is the highest level of schooling that he/she has completed, or what grade is he/she in currently?
- What is the occupation of each adult who regularly resides in the household? What is the highest level of schooling that they have completed?

### **Daily life (adults)**

- Please describe a typical day in your life before your child became ill with TB (from the time you woke up in the morning until the time you went to sleep at night).
  - o What, if anything, is different about your daily routine now that your child has TB?
  - o In what ways has having a sick child changed your responsibilities inside and/or outside of the home?
- How has the child's father's routine, work and responsibilities been impacted by your child's TB illness?
- What has been the impact on your family's finances to have a child with TB?

### **Daily life (children)**

- Please describe a typical day in the life of your child before he/she became ill with TB.
  - o What, if anything, is different about his/her daily routine now that he/she has TB?
- (For school-aged children only) How has having TB impacted your child's schooling?
  - o In what ways has having TB impacted his/her relationships with friends? How about relationships with other children in your neighborhood or village? How has TB illness affected your child's relationships with other children in his/her school?
- Having a child with TB can also have an impact on healthy children living in your household. In what ways has having a sick child affected your other children's lives, feelings and/or routines?

### **Family + community members**

- How have extended family members (uncles, aunts, grandparents, cousins, half siblings, etc.) reacted to your child's illness?
- How have your neighbors and your community reacted to your child's illness? Has your relationship with neighbors/community members changed in any way since your child was diagnosed with TB? Please explain.

### **Research**

- As our interview comes to a close, I wanted to ask you a few final questions about your experience participating in this research study.
  - o Please tell me about any previous experiences that you or your relatives have had participating in research studies at HLH or elsewhere.
  - o How did you decide to enroll your child/yourself in the study? What motivated you to do so?
  - o What did you find most rewarding about the experience? Most challenging?
  - o We are always trying to learn ways in which we could do a better job in our work. If you could give one (or more) recommendation to improve the research experience for participants and their families, what would it be?

### **Other**

- Is there anything else you would like to add that we have not talked about?The appendix is an optional section that can contain details and data supplemental to the main text—for example, explanations of experimental details that would disrupt the flow of the main text but nonetheless remain crucial to understanding and reproducing the research shown; figures of replicates for experiments of which representative data is shown in the main text can be added here if brief, or as Supplementary data. Mathematical proofs of results not central to the paper can be added as an appendix.
